# Supplementary material
Source: PubMed Central journal article supplement (PMC9989358)
Supplement: web_material_kwac075.pdf [file web_material_kwac075.pdf]

## **WEB MATERIAL**

### **Relationship Between Level of American Football Playing and Diagnosis of Chronic Traumatic Encephalopathy in a Selection Bias Analysis**

Jessica LeClair, Jennifer Weuve, Matthew P. Fox, Jesse Mez, Michael L. Alosco, Chris Nowinski, Ann McKee, and Yorghos Tripodis

Contents:

Web Appendix

## Web Appendix

Suppose we have the following observed data, where  $E$  and  $D$  represent exposure and disease levels, respectively:

|       |       |       |
|-------|-------|-------|
|       | $E +$ | $E -$ |
| $D +$ | $a$   | $b$   |
| $D -$ | $c$   | $d$   |

Furthermore, suppose we have the following data from our target population, which is unobserved:

|       |       |       |
|-------|-------|-------|
|       | $E +$ | $E -$ |
| $D +$ | $A$   | $B$   |
| $D -$ | $C$   | $D$   |

The true risk ratio of interest is:

$$RR = \frac{A/(A+C)}{B/(B+D)} = \frac{A(B+D)}{B(A+C)}.$$

We can express our observed counts as a weighted probability of being selected into the study, i.e.,

$$d = P(S|D-, E-) * D \rightarrow D = d * \frac{1}{P(S|D-, E-)}.$$

Substituting these selection probabilities into the RR equation:

$$RR_{\text{Selection bias adjusted}} = \frac{\frac{a/P(S|D+, E+)}{(a/P(S|D+, E+) + c/P(S|D-, E+))}}{\frac{b/P(S|D+, E-)}{(b/P(S|D+, E-) + d/P(S|D-, E-))}}$$

We want to factor out the RR for the observed data  $\frac{a(b+d)}{b(a+c)}$ :

$$\begin{aligned}
&= \frac{a/P(S|D+, E+)}{(a/P(S|D+, E+) + c/P(S|D-, E+))} * \frac{\frac{b}{P(S|D+, E-)} + \frac{d}{P(S|D-, E-)}}{b/P(S|D+, E-)} \\
&= \frac{P(S|D+, E-)}{P(S|D+, E+)} \frac{a \left( \frac{b}{P(S|D+, E-)} + \frac{d}{P(S|D-, E-)} \right)}{b \left( \frac{a}{P(S|D+, E+)} + \frac{c}{P(S|D-, E+)} \right)} \\
&= \frac{P(S|D+, E-)}{P(S|D+, E+)} \frac{a(b+d)}{b(a+c)} \frac{1}{(b+d)} \left( \frac{b P(S|D-, E-) + d P(S|D+, E-)}{P(S|D+, E-) P(S|D-, E-)} \right) \\
&\quad \frac{1}{(a+c)} \left( \frac{a P(S|D-, E+) + c P(S|D+, E+)}{P(S|D+, E+) P(S|D-, E+)} \right) \\
&= \frac{P(S|D+, E-) P(S|D+, E+) P(S|D-, E+)}{P(S|D+, E+) P(S|D+, E-) P(S|D-, E-)} * \frac{a(b+d)}{b(a+c)} * \frac{(a+c)}{(b+d)} \\
&\quad * \frac{b P(S|D-, E-) + d P(S|D+, E-)}{a P(S|D-, E+) + c P(S|D+, E+)}
\end{aligned}$$

$RR_{\text{selection bias adjusted}}$

$$= RR_{\text{observed}} \frac{(a+c)}{(b+d)} * \frac{P(S|D-, E+)}{P(S|D-, E-)} * \frac{b P(S|D-, E-) + d P(S|D+, E-)}{a P(S|D-, E+) + c P(S|D+, E+)}$$
